# Supplementary material for: The Medicinal Plant Pair Bupleurum chinense-Scutellaria baicalensis – Metabolomics and Metallomics Analysis in a Model for Alcoholic Liver Injury
Source: PubMed Central journal article supplement (PMC6445227; doi:10.3389/fphar.2019.00254), 2019-03-20
Supplement: Data_Sheet_1.pdf [file Data_Sheet_1.pdf]

## Sheet 1 Experimental parameters for ICP-MS and GC-MS

### a The experimental parameters used for ICP-MS

| Parameters         |           |
|--------------------|-----------|
| Forward Power      | 1500 W    |
| Reflected Power    | 1 W       |
| Carrier Gas        | 1.0 L/min |
| S/C Temperature    | 2 °C      |
| Nebulizer Pump     | 0.1 rps   |
| Repetition         | 3         |
| Uptake Speed       | 0.30 rps  |
| Uptake Time        | 30 sec    |
| Stabilization Time | 45 sec    |

### b The temperature program of GC-MS

| Rate(°C/min) | Temperature(°C) | Hold time(min) |
|--------------|-----------------|----------------|
|              | 70              | 2              |
| 5            | 120             | 2              |
| 3            | 190             | 0              |
| 5            | 210             | 0              |
| 10           | 260             | 0              |
| 5            | 290             | 0              |
