# Supplementary material for: The Medicinal Plant Pair Bupleurum chinense-Scutellaria baicalensis – Metabolomics and Metallomics Analysis in a Model for Alcoholic Liver Injury
Source: Front Pharmacol. 2019 Mar 20;10:254. doi: 10.3389/fphar.2019.00254 (PMC6445227; doi:10.3389/fphar.2019.00254)
Supplement: Supplementary file 1 [file Table_1.xlsx]

## Sheet: Biochemical indicators
			SI_Table 1 Resutls of biochemical analysis and quantized results of liver tissue histopathology
				ALT	AST	GLU	CHOL	TG		Raw data
				U/L	U/L	mmol/L	mmol/L	mmol/L
			N	31.75	167.625	7.9875	1.73375	0.5
			M	61.125	166.375	8.20875	4.17875	0.82
			BU	58.625	76.125	9.2975	4.46375	0.3525
			SC	34.625	144.875	8.76875	1.88625	0.58625
			BS	34.375	146.875	8.4075	1.73	0.7025
			SA	41.25	95.375	8.89875	3.76375	0.085
			BA	43.625	160.5	10.3625	1.83375	0.70125
			MI	42.75	145.625	9.69375	1.8825	0.705
				ALT	AST	GLU	CHOL	TG		Relative ratio
			N	1	1	1	1	1
			M	1.9252	0.992543	1.0277	2.41024	1.64
			BU	1.84646	0.454139	1.16401	2.57462	0.705
			SC	1.09055	0.86428	1.09781	1.08796	1.1725
			BS	1.08268	0.876212	1.05258	0.997837	1.405
			SA	1.29921	0.568978	1.11408	2.17087	0.17
			BA	1.37402	0.957494	1.29734	1.05768	1.4025
			MI	1.34646	0.868755	1.21362	1.0858	1.41
				ALT	AST	GLU	CHOL	TG	Average	Recoveray ratio
			M	0.925197	0.00745712	0.0276995	1.41024	0.64	0.602118
			BU	0.846457	0.545861	0.164006	1.57462	0.295	0.685189
			SC	0.0905512	0.13572	0.0978091	0.0879596	0.1725	0.116908
			BS	0.0826772	0.123788	0.0525822	0.00216294	0.405	0.133242
			SA	0.299213	0.431022	0.114085	1.17087	0.83	0.569038
			BA	0.374016	0.0425056	0.29734	0.0576784	0.4025	0.234808
			MI	0.346457	0.131245	0.213615	0.0857967	0.41	0.237423
